# Supplementary material
Source: PubMed Central journal article supplement (PMC3823813)
Supplement: NIHMS513587-supplement-7.pdf [file NIHMS513587-supplement-7.pdf]

## Supplemental Table 1

| <b>qPCR primers</b>    | <b>Primer sequences</b>                                                                                 |
|------------------------|---------------------------------------------------------------------------------------------------------|
| KLK3/PSA               | Forward: TGTGTGCTGGACGCTGGA<br>Reverse: CACTGCCCATGACGTGAT                                              |
| TMPRSS2                | Forward: GGACAGTGTGCACCTCAAAGAC<br>Reverse: TCCCACGAGGAAGGTCCC                                          |
| FKBP5                  | Forward: GCAACAGTAGAAATCCACCTG<br>Reverse: CTCCAGAGCTTTGTCAATTCC                                        |
| GAPDH                  | Forward: AACAGCCTCAAGATCATCAG<br>Reverse: CATGAGTCCTTCCACGATAC                                          |
| YFP INTERNAL CONTROL 1 | Forward: GCTGGTTTAGTGAACCGTCAG<br>Reverse (1): GCTGAACTTGTGGCCGTTTA<br>Reverse (2): GGACACGCTGAACTTGTGG |
| YFP INTERNAL CONTROL 2 | Forward: CAACGGGACTTTCCAAAATG<br>Reverse: CTCCTCGCCCTTGCTCAC                                            |
| YFP LIGATED PRODUCT 1  | Forward: AGTCGTGTCTTACCGGGTTG<br>Reverse: AGTTCGGTGTAGGTCGTTCCG                                         |
| YFP LIGATED PRODUCT 2  | Forward: TACATCAATGGGCGTGGATA<br>Reverse: AAGTCCCGTTGATTTTGGTG                                          |
| <b>ChIP primers</b>    | <b>Primer sequences</b>                                                                                 |
| XRCC2 AROR 1           | Forward: GCCTGAACAATGGAGATAAAAAGAG<br>Reverse: TGCCTCAGGGAACAAATAAGAC                                   |
| XRCC2 AROR 2           | Forward: AGCCAAAACACTCCCTCAAG<br>Reverse: CTC AAGTCATCTTCCCACCTC                                        |
| XRCC3 AROR 1           | Forward: GCCAGCGTTTTGTAACTG<br>Reverse: GGATTTGGATCTACTGGACCTG                                          |
| PRKDC AROR 1           | Forward: GCATCGCTAGGGAACAAGG<br>Reverse: CTGCGATAAACATCTTGACAGAG                                        |
| PRKDC AROR 2           | Forward: AAGGTGTCACTTCTGTTTAC<br>Reverse: TGAGCTATGCTGATTTTACCTAGG                                      |
| PSA Middle             | Forward: CAGTGGCCATGAGTTTTGTTTG<br>Reverse: AACCAATCCAACCTGCATTATACACA                                  |
